# Supplementary material
Source: PubMed Central journal article supplement (PMC10662123)

**Figure S1.** A. Additional information on the identified *B. theta* TonB proteins. B and C. Sequence similarity via pairwise sequence alignment of full TonB protein (B) or C-terminal TonB domain as defined in Table 1 (C). The number of matches of the total alignment length is shown in parentheses.

A

| Protein Name | Locus Tag | # of Predicted TMH            | Location of Helices (residue #s)      | Notes                                                                                                                                                      |
|--------------|-----------|-------------------------------|---------------------------------------|------------------------------------------------------------------------------------------------------------------------------------------------------------|
| TonB1        | BT0813    | 5                             | 4-26, 38-57, 93-155, 188-207, 274-296 |                                                                                                                                                            |
| TonB2        | BT1056    | 1 (low confidence prediction) | 60-85                                 | <ul style="list-style-type: none"> <li>• Potential miscalled start due to overlap with BT1055</li> </ul>                                                   |
| TonB3        | BT1668    | 0                             |                                       | <ul style="list-style-type: none"> <li>• SPI cleavage site between residues 19 and 20</li> </ul>                                                           |
| TonB4        | BT2059    | 1                             | 15-37                                 |                                                                                                                                                            |
| TonB5        | BT2665    | 1                             | 38-57                                 |                                                                                                                                                            |
| TonB6        | BT2762    | 1                             | 16-38                                 |                                                                                                                                                            |
| TonB7        | BT3192    | 0                             |                                       | <ul style="list-style-type: none"> <li>• Often annotated as TBDT due to PF13715</li> </ul>                                                                 |
| TonB8        | BT3673    | 0                             |                                       | <ul style="list-style-type: none"> <li>• At end of RG-II PUL3 (Ndeh 2017)</li> <li>• SPI cleavage site between residues 20 and 21</li> </ul>               |
| TonB9        | BT3896    | 0                             |                                       | <ul style="list-style-type: none"> <li>• Potential miscalled start due to overlap with BT3897</li> </ul>                                                   |
| TonB10       | BT3898    | 4                             | 5-27, 39-93, 94-116, 275-297          |                                                                                                                                                            |
| TonB11       | BT4460    | 1                             | 65-87                                 | <ul style="list-style-type: none"> <li>• Potential miscalled start due to overlap with BT4461</li> <li>• Often annotated as TBDT due to PF13715</li> </ul> |

B

|                  | BT1056<br>TonB2    | BT1668<br>TonB3    | BT2059<br>TonB4    | BT2665<br>TonB5    | BT2762<br>TonB6    | BT3192<br>TonB7    | BT3673<br>TonB8   | BT3896<br>TonB9    | BT3898<br>TonB10   | BT4460<br>TonB11   | <i>E. coli</i>     |
|------------------|--------------------|--------------------|--------------------|--------------------|--------------------|--------------------|-------------------|--------------------|--------------------|--------------------|--------------------|
| BT0813<br>TonB1  | 26.5%<br>(131/494) | 33.3%<br>(166/499) | 26.6%<br>(131/492) | 26.5%<br>(132/498) | 27.0%<br>(126/467) | 27.0%<br>(126/467) | 15.8%<br>(93/589) | 17.1%<br>(96/563)  | 46.1%<br>(289/627) | 28.5%<br>(160/562) | 18.1%<br>(91/504)  |
| BT1056<br>TonB2  |                    | 28.2%<br>(113/400) | 41.9%<br>(125/298) | 44.6%<br>(137/307) | 44.3%<br>(132/298) | 38.8%<br>(119/307) | 20.1%<br>(86/427) | 4.07%<br>(134/329) | 20.6%<br>(133/646) | 21.7%<br>(107/492) | 29.7%<br>(89/300)  |
| BT1668<br>TonB3  |                    |                    | 28.7%<br>(107/373) | 26.4%<br>(107/406) | 21.8%<br>(89/409)  | 28.7%<br>(108/376) | 14.3%<br>(71/495) | 16.8%<br>(82/489)  | 20.1%<br>(135/671) | 19.6%<br>(112/572) | 10.5%<br>(50/474)  |
| BT2059<br>TonB4  |                    |                    |                    | 50.7%<br>(144/284) | 73.1%<br>(166/227) | 41.2%<br>(117/284) | 24.2%<br>(93/384) | 40.9%<br>(122/298) | 18.7%<br>(122/652) | 17.6%<br>(87/494)  | 36.8%<br>(100/272) |
| BT2665<br>TonB5  |                    |                    |                    |                    | 51.6%<br>(141/273) | 37.3%<br>(116/311) | 20.0%<br>(85/425) | 25.3%<br>(99/392)  | 20.6%<br>(140/681) | 21.7%<br>(108/497) | 34.1%<br>(101/296) |
| BT2762<br>TonB6  |                    |                    |                    |                    |                    | 30.2%<br>(97/321)  | 24.9%<br>(94/378) | 28.4%<br>(101/356) | 19.6%<br>(124/632) | 20.1%<br>(94/468)  | 36.8%<br>(95/258)  |
| BT3192<br>TonB7  |                    |                    |                    |                    |                    |                    | 19.9%<br>(80/402) | 37.3%<br>(116/311) | 21.6%<br>(133/616) | 25.5%<br>(121/474) | 33.8%<br>(95/281)  |
| BT3673<br>TonB8  |                    |                    |                    |                    |                    |                    |                   | 39.7%<br>(129/325) | 17.7%<br>(122/689) | 9.2%<br>(56/609)   | 12.9%<br>(54/420)  |
| BT3896<br>TonB9  |                    |                    |                    |                    |                    |                    |                   |                    | 26.7%<br>(165/618) | 27.3%<br>(131/479) | 28.9%<br>(98/339)  |
| BT3898<br>TonB10 |                    |                    |                    |                    |                    |                    |                   |                    |                    | 26.1%<br>(182/698) | 18.4%<br>(114/618) |
| BT4460<br>TonB11 |                    |                    |                    |                    |                    |                    |                   |                    |                    |                    | 16.5%<br>(85/514)  |

C

|                             | BT1056<br>TonB2  | BT1668<br>TonB3  | BT2059<br>TonB4  | BT2665<br>TonB5  | BT2762<br>TonB6  | BT3192<br>TonB7  | BT3673<br>TonB8  | BT3896<br>TonB9<br>TonB_C1 | BT3896<br>TonB9<br>TonB_C2 | BT3898<br>TonB10<br>TonB_C1 | BT3898<br>TonB10<br>TonB_C2 | BT4460<br>TonB11 | <i>E. coli</i>   |
|-----------------------------|------------------|------------------|------------------|------------------|------------------|------------------|------------------|----------------------------|----------------------------|-----------------------------|-----------------------------|------------------|------------------|
| BT0813<br>TonB1             | 73.4%<br>(58/79) | 58.4%<br>(45/77) | 88.5%<br>(69/78) | 75.6%<br>(59/78) | 78.2%<br>(61/78) | 67.9%<br>(55/81) | 76.9%<br>(60/78) | 70.1%<br>(54/77)           | 74.4%<br>(58/78)           | 74.4%<br>(58/78)            | 70.5%<br>(55/78)            | 45.5%<br>(35/77) | 49.4%<br>(39/79) |
| BT1056<br>TonB2             |                  | 53.8%<br>(42/78) | 78.5%<br>(62/79) | 74.7%<br>(59/79) | 79.7%<br>(63/79) | 57.8%<br>(48/83) | 72.2%<br>(57/79) | 58.2%<br>(46/79)           | 67.1%<br>(53/79)           | 68.4%<br>(54/79)            | 68.4%<br>(54/79)            | 36.7%<br>(29/79) | 40.2%<br>(33/82) |
| BT1668<br>TonB3             |                  |                  | 53.8%<br>(42/78) | 85.9%<br>(67/78) | 87.2%<br>(68/78) | 65.4%<br>(53/81) | 74.4%<br>(58/78) | 67.9%<br>(53/78)           | 69.2%<br>(54/78)           | 80.8%<br>(63/78)            | 78.2%<br>(61/78)            | 42.3%<br>(33/78) | 41.2%<br>(33/80) |
| BT2059<br>TonB4             |                  |                  |                  | 85.9%<br>(67/78) | 88.5%<br>(69/78) | 70.4%<br>(57/81) | 79.5%<br>(62/78) | 65.4%<br>(51/78)           | 73.1%<br>(57/78)           | 76.9%<br>(60/78)            | 74.4%<br>(58/78)            | 42.3%<br>(33/78) | 45.1%<br>(37/82) |
| BT2665<br>TonB5             |                  |                  |                  |                  | 87.2%<br>(68/78) | 65.4%<br>(53/81) | 74.4%<br>(58/78) | 67.9%<br>(53/78)           | 69.2%<br>(54/78)           | 80.8%<br>(63/78)            | 78.2%<br>(61/78)            | 42.3%<br>(33/78) | 41.2%<br>(33/80) |
| BT2762<br>TonB6             |                  |                  |                  |                  |                  | 66.7%<br>(54/81) | 75.6%<br>(59/78) | 67.9%<br>(53/78)           | 69.2%<br>(54/78)           | 75.6%<br>(59/78)            | 78.2%<br>(61/78)            | 41.0%<br>(32/78) | 39.5%<br>(34/86) |
| BT3192<br>TonB7             |                  |                  |                  |                  |                  |                  | 61.7%<br>(50/81) | 58.0%<br>(47/81)           | 66.7%<br>(54/81)           | 61.7%<br>(50/81)            | 61.7%<br>(50/81)            | 45.7%<br>(37/81) | 46.9%<br>(38/81) |
| BT3673<br>TonB8             |                  |                  |                  |                  |                  |                  |                  | 65.4%<br>(51/78)           | 66.7%<br>(52/78)           | 70.5%<br>(55/78)            | 65.4%<br>(51/78)            | 39.7%<br>(31/78) | 40.0%<br>(32/80) |
| BT3896<br>TonB9<br>TonB_C1  |                  |                  |                  |                  |                  |                  |                  |                            | 62.8%<br>(49/78)           | 64.1%<br>(50/78)            | 60.3%<br>(47/78)            | 41.6%<br>(32/77) | 43.8%<br>(35/80) |
| BT3896<br>TonB9<br>TonB_C2  |                  |                  |                  |                  |                  |                  |                  |                            |                            | 70.5%<br>(55/78)            | 70.5%<br>(55/78)            | 46.2%<br>(36/78) | 43.9%<br>(36/82) |
| BT3898<br>TonB10<br>TonB_C1 |                  |                  |                  |                  |                  |                  |                  |                            |                            |                             | 73.1%<br>(57/78)            | 41.0%<br>(32/78) | 41.0%<br>(34/83) |
| BT3898<br>TonB10<br>TonB_C2 |                  |                  |                  |                  |                  |                  |                  |                            |                            |                             |                             | 42.3%<br>(33/78) | 43.8%<br>(35/80) |
| BT4460<br>TonB11            |                  |                  |                  |                  |                  |                  |                  |                            |                            |                             |                             |                  | 37.8%<br>(28/74) |

**Figure S2.** Multiple sequence alignment of the eleven identified TonB proteins from *B. thetaiotaomicron* with *E. coli* TonB and *Pseudomonas aeruginosa*

TonB1. Highly conserved residues discussed in the text are highlighted in yellow, deviations from this conservation are highlighted in green.

|                                |                                                              |     |
|--------------------------------|--------------------------------------------------------------|-----|
| Pseudomonas_aeruginosa_TonB1   | -----                                                        | 0   |
| Escherichia_coli_TonB          | -----                                                        | 0   |
| BT4460                         | -----                                                        | 0   |
| BT1668                         | -----MKKIVISLLLLLSFRLSAQ-----IDYLEPVKPFTTYT--                | 34  |
| BT3896_Nterm_plus_TonB_Domain1 | -----                                                        | 0   |
| BT3192                         | -----                                                        | 0   |
| BT1056                         | -----                                                        | 0   |
| BT3673                         | -----                                                        | 0   |
| BT2059                         | -----                                                        | 0   |
| BT0813                         | MESFAIYLIKVNIALIVLYAFYKLSFSKDTFFRLRRIMLLLICVTSLIYPLIDFSGWTDE | 60  |
| BT3896_TonB_Domain2            | -----                                                        | 0   |
| BT3898_Nterm_plus_TonB_Domain1 | MTPELAYFLKINVAIALFYAFYRLFFHKDTFFHWRRTALLCFFGISLLYPLLNIQEWIKE | 60  |
| BT2665                         | -----                                                        | 0   |
| BT2762                         | -----                                                        | 0   |
| BT3898_TonB_Domain2            | -----                                                        | 0   |
|                                |                                                              |     |
| Pseudomonas_aeruginosa_TonB1   | -----                                                        | 0   |
| Escherichia_coli_TonB          | -----                                                        | 0   |
| BT4460                         | -----                                                        | 0   |
| BT1668                         | -----G-----                                                  | 35  |
| BT3896_Nterm_plus_TonB_Domain1 | -----                                                        | 0   |
| BT3192                         | -----                                                        | 0   |
| BT1056                         | -----                                                        | 0   |
| BT3673                         | -----                                                        | 0   |
| BT2059                         | -----                                                        | 0   |
| BT0813                         | YAIGETFTTVYNKL-LPEVLVTTALPVATTEVEVTTWQAG--TWLWIIYGLGIGMLLLRN | 117 |
| BT3896_TonB_Domain2            | -----                                                        | 0   |
| BT3898_Nterm_plus_TonB_Domain1 | QEPMVAMADLYATIILPEQIIEAP-----QETTANWQELIPQILGFIYWTGVLLLALRF  | 114 |
| BT2665                         | -----                                                        | 0   |
| BT2762                         | -----                                                        | 0   |
| BT3898_TonB_Domain2            | -----                                                        | 0   |

|                                |                                                                |     |
|--------------------------------|----------------------------------------------------------------|-----|
| Pseudomonas_aeruginosa_TonB1   | -----                                                          | 0   |
| Escherichia_coli_TonB          | -----                                                          | 0   |
| BT4460                         | -MKLLDYIRG-----LRKGKEAHRLEKESMKDPFLADAMDGYHQVEGDHEEQINKLRM     | 52  |
| BT1668                         | --ELGEYYRNVFSL-----LNTGFQQRPYARFVAIP---S--FSPEYA-----          | 71  |
| BT3896_Nterm_plus_TonB_Domain1 | -----                                                          | 0   |
| BT3192                         | -----                                                          | 0   |
| BT1056                         | -----MKRKGQTCKILKDIR-----                                      | 15  |
| BT3673                         | -----                                                          | 0   |
| BT2059                         | -----MEVKK                                                     | 5   |
| BT0813                         | LLEVSKIHRSLVCSQRYSLKGVVPVYQSEDEVGEPSCFFHWIFIN---PMQYSDKEINEILI | 174 |
| BT3896_TonB_Domain2            | -----                                                          | 0   |
| BT3898_Nterm_plus_TonB_Domain1 | LIQLGSIIRLHFLCPKSTIQGSRVHILKKGTPFSFFHWIFIH---PESHTESEISEIIT    | 171 |
| BT2665                         | -----                                                          | 0   |
| BT2762                         | -----                                                          | 0   |
| BT3898_TonB_Domain2            | -----                                                          | 0   |
|                                |                                                                |     |
| Pseudomonas_aeruginosa_TonB1   | -----                                                          | 0   |
| Escherichia_coli_TonB          | -----                                                          | 0   |
| BT4460                         | KVNAHSAKKRNTYAVTWSIAACLIIGIGISSYFLFLK----Q--NVGEDVFIAKEQPAA    | 105 |
| BT1668                         | ---MSVEK-----KNGRCLLIANTLSRTYWQAEK-----GTV-----KVET            | 104 |
| BT3896_Nterm_plus_TonB_Domain1 | -----                                                          | 0   |
| BT3192                         | -----MKRLSFILSFIV---CICV-----                                  | 16  |
| BT1056                         | ---RQIAE-----ANDIE----FITSEC-----                              | 31  |
| BT3673                         | -----                                                          | 0   |
| BT2059                         | SPKADLEG-----KKSTWLLIGYVVVLAFMFVAFEWTRQDVKIDTSQAVA-----        | 50  |
| BT0813                         | HEQTHVRE-----LHSLDIILVQLVILLCWFPNPFVWLRSEIRMNHEYLDKQVVT        | 225 |
| BT3896_TonB_Domain2            | -----                                                          | 0   |
| BT3898_Nterm_plus_TonB_Domain1 | HEETHARQ-----YHSADVLVSEIMCTFCWFNPFVWLMKREVRGNLEYMADHRVLE       | 222 |
| BT2665                         | -----MAKLDLASSEWCQ-LIF-----                                    | 16  |
| BT2762                         | -----M-----                                                    | 1   |
| BT3898_TonB_Domain2            | -----                                                          | 0   |
|                                |                                                                |     |
| Pseudomonas_aeruginosa_TonB1   | -----MSPQPSR---SPDRFSLAALAEDHPTAPAQGDE----SESLPC               | 36  |
| Escherichia_coli_TonB          | -----                                                          | 0   |
| BT4460                         | TATVPAHKEDTSLSAPKMEPDSGRPSATKETVGGKDIIAKTRQDSPSQSTPSGAPSATVPK  | 165 |
| BT1668                         | K-----SVE-----ISQSLYQS-----                                    | 116 |
| BT3896_Nterm_plus_TonB_Domain1 | -----                                                          | 0   |
| BT3192                         | -----                                                          | 16  |
| BT1056                         | -----QYQGDC-----                                               | 37  |
| BT3673                         | -----                                                          | 0   |
| BT2059                         | -----                                                          | 50  |
| BT0813                         | S-----GYD-----KKSYYHL-----                                     | 237 |
| BT3896_TonB_Domain2            | -----                                                          | 0   |
| BT3898_Nterm_plus_TonB_Domain1 | T-----GHD-----SKSYQYHL-----                                    | 234 |
| BT2665                         | E-----GKN-----QAYGAYR-----                                     | 27  |
| BT2762                         | E-----AKK-----SKKAA-----                                       | 10  |
| BT3898_TonB_Domain2            | -----                                                          | 0   |

|                                |                                                           |     |
|--------------------------------|-----------------------------------------------------------|-----|
| Pseudomonas_aeruginosa_TonB1   | VN-----AQRGEPNLRVV-----DCSGARRDE----EVAVEEV               | 65  |
| Escherichia_coli_TonB          | -----                                                     | 0   |
| BT4460                         | AVASKAATPQATPAGTPIMEEMVAPAEELAAAITTVTDTSFLDANRKKMKAQ----- | 219 |
| BT1668                         | -----LGAIARL-----                                         | 123 |
| BT3896_Nterm_plus_TonB_Domain1 | -----                                                     | 0   |
| BT3192                         | -----AN---TND                                             | 21  |
| BT1056                         | -----LGTCPKCE--AEVR---                                    | 49  |
| BT3673                         | -----                                                     | 0   |
| BT2059                         | -----DVVFEEE                                              | 57  |
| BT0813                         | -----LGIKHTSLAAANFYNNFS                                   | 255 |
| BT3896_TonB_Domain2            | -----                                                     | 0   |
| BT3898_Nterm_plus_TonB_Domain1 | -----LGLAHHKA-AANLSNSFN                                   | 251 |
| BT2665                         | -----                                                     | 27  |
| BT2762                         | -----                                                     | 10  |
| BT3898_TonB_Domain2            | -----                                                     | 0   |

|                                |                                                           |     |
|--------------------------------|-----------------------------------------------------------|-----|
| Pseudomonas_aeruginosa_TonB1   | LIPYA--HGSDPEDVPGEPKSRWWLSSGAAVAMHVAIIGALVWVMPTP-----     | 112 |
| Escherichia_coli_TonB          | -----MTLDLPRRFPWPT-LLSVCIHGAVVAGLLYTSVHQ-----             | 34  |
| BT4460                         | ---LTTQMNMIKGVTTDD--RG-----E-----PLVGANVTY-----KGAT       | 251 |
| BT1668                         | ---VTSQI-QDLDGSTAGL-----DGVVYF--SS-----                   | 147 |
| BT3896_Nterm_plus_TonB_Domain1 | ----MKH-QQL--SRANGTKRPFLLA-LI-----AF-SLGFC-----           | 28  |
| BT3192                         | VFSQKREL-QQFKGKVTNL-----Q-GE-----PVRAVSIYI-PGTGRYT-----   | 58  |
| BT1056                         | --YLE---QQLERKRM---AGKAIT-IL-----GISAGLVAMAPMTSCSSSPNKGTN | 92  |
| BT3673                         | -----                                                     | 0   |
| BT2059                         | IIPITETP-EQATPPPPEA-----P-----KVAE-LLEI--VDDQ-----        | 88  |
| BT0813                         | VLPLKKRI-KMLNRKRTHNIMVGKYLFI-----PVAA-LLLL--FSNCAN--KKA-- | 300 |
| BT3896_TonB_Domain2            | -----                                                     | 0   |
| BT3898_Nterm_plus_TonB_Domain1 | VLPLKNRI-KMMNKRRTKEIGRTKYLFI-----PLAA-LLMI--ISN-----      | 290 |
| BT2665                         | -----MRANSRRHTIAM-LI-----VVAI--AI--VGFTIP--TL---          | 56  |
| BT2762                         | -----IENQRGSWLLM-GL-----VVAL-AFMF--VSFEWT--QHD--          | 40  |
| BT3898_TonB_Domain2            | -----                                                     | 0   |

**Proline-rich linker**

|                                |                                                              |     |
|--------------------------------|--------------------------------------------------------------|-----|
| Pseudomonas_aeruginosa_TonB1   | -----AELNLGHGELPKTMQVNFVQL-EKKAEP----TPQPPAAAP-EPTPPKIEEP    | 158 |
| Escherichia_coli_TonB          | -----VIELPAPA--QPISVTMVTP-ADLEPPQAVQPPPEPVVEP-EPE----PEP     | 77  |
| BT4460                         | YGAITDINGEFLPKKKEGNEILTAHYIGY----NP--VSIP-ADTSKNMLIA---MSEN  | 300 |
| BT1668                         | ----TDAKG-----KEMMGRKWSPMKGTLMERLVL--VCQSTYMFSQGENISEQALAAE  | 195 |
| BT3896_Nterm_plus_TonB_Domain1 | -----HYA-----                                                | 31  |
| BT3192                         | ---SSDMNGDFSVEAKHKETLRFSHIG---M-----                         | 83  |
| BT1056                         | QETISDSTN-----ASVMFGEI-----CPTPVE-----DTIP-MVEK              | 123 |
| BT3673                         | -----                                                        | 0   |
| BT2059                         | ---ADIEEST-----T-----                                        | 96  |
| BT0813                         | DKVQSDTEKAD-----T-----                                       | 312 |
| BT3896_TonB_Domain2            | -----                                                        | 0   |
| BT3898_Nterm_plus_TonB_Domain1 | IEVVARTTK-----EFAKEMM-----AAPEEQGVSTELANGP-----              | 323 |
| BT2665                         | LKLATPEQKEVMTEVTTLSKLAEPEIKQEEMKRVEP--VAPPPPALKSSIKFTAP-VIKK | 113 |
| BT2762                         | VRVAAVSSDDESIFVTELVPITFPE-----EKLE---PPPPPETKVELFE---IVDD    | 87  |
| BT3898_TonB_Domain2            | -----                                                        | 0   |

**Proline-rich linker**

|                                |                                                                |     |
|--------------------------------|----------------------------------------------------------------|-----|
| Pseudomonas_aeruginosa_TonB1   | KPEPPKPKP--VEKPKPKPKPKP-----PVENAI PKAKPKPEPKPKPEPEPSTEAS      | 208 |
| Escherichia_coli_TonB          | IPEPPKEAPVVI EKPKPKPKPKP-----PVKKVQE QPKR--DVKPV-----ES--      | 119 |
| BT4460                         | KT-TLDEVVVVTG---YGA-QKKVAVTG AISAVSIKDLKKASG-----A--LQKSDT--   | 344 |
| BT1668                         | ATALLKELE-HRTKEQPDAHKKPMYVGIYSVGPKL-----KT----                 | 231 |
| BT3896_Nterm_plus_TonB_Domain1 | -----EAKVQPT EAF TSN-----V-----DSL IINDNNK--                   | 55  |
| BT3192                         | -----KDVLIQLDKDFPSELLV RMKPD T FQINNI---FIQKK-----QI IKVKPED-- | 126 |
| BT1056                         | DTVNKQE-----LPELPQ-E-----MGLIEITPISGDIITVK-----DSLSEK--        | 160 |
| BT3673                         | -----MNTK-----LFGLFIALLV--CLPSLAQQK PVEK--                     | 27  |
| BT2059                         | -----ILNEDNTPKV--EVKYVPVQVVEEE--                               | 119 |
| BT0813                         | -----IELTA-EPE--KTAE PQVDITITE--                               | 333 |
| BT3896_TonB_Domain2            | -----                                                          | 0   |
| BT3898_Nterm_plus_TonB_Domain1 | -----ELPDGM-----TG VATLQDKKGMQKTKEV--APPPPPAPVKSAT--           | 360 |
| BT2665                         | DEEVHEDDEIKSQEELTSTK-----V-AISIADV KGNDEANGA--DIADLK-QVVTQA--  | 162 |
| BT2762                         | TEEVTDNVSVVPD-----NV--N---EPY--KV VVVPV VETKE--                | 119 |
| BT3898_TonB_Domain2            | -----                                                          | 0   |

**C-term domain begins**

|                                |                                                               |     |
|--------------------------------|---------------------------------------------------------------|-----|
| Pseudomonas_aeruginosa_TonB1   | SQPSPSSAAPPAPT VQGSTPGAQTAPSGSQGPAGLPSGSLNDS DIKPLRMDPPVYPRMA | 268 |
| Escherichia_coli_TonB          | RPASP FENTAPARPTSS-----TATAAT----SKPVT-SVASGPRALSRNQPYPARA    | 167 |
| BT4460                         | -----LKDAVISQK-----ADSLQGPVVPEPVTGMKQYKKYLKKNLAYPADD          | 386 |
| BT1668                         | -----HS-----GKQIEELPCL--ADV CVREYVAGQMIYPAEL                  | 262 |
| BT3896_Nterm_plus_TonB_Domain1 | -----DKDETI-----YEAVDEMPKFPGGTQALFKYLG ENIQYPEEV              | 92  |
| BT3192                         | -----MPEQTM-----INF IINGPDFP GGLSGFDEF IKKNIQYPEEA            | 163 |
| BT1056                         | -----DSLTDV-----LEVAAVMPEFP GGARELMKFISANIRYPSMS              | 197 |
| BT3673                         | -----VDS DGV-----YLMPDQMPEFP GGMQAMMKFLT TNIKYPVEA            | 64  |
| BT2059                         | -----PEEQTI-----FEVVENMPDFP GGQAALMQYLAKNIKYPTIA              | 156 |
| BT0813                         | -----TKGDSI-----YSVVETMPDFP GGQKELLSF LSRNIKYPTKA             | 370 |
| BT3896_TonB_Domain2            | -----HITYWKNA                                                 | 8   |
| BT3898_Nterm_plus_TonB_Domain1 | -----VNDSVV-----FEVVEEMPDFP GGQSALMEYLAKNIKYPATA              | 397 |
| BT2665                         | -----AEPEKV-----FDMVEQMPTFP GGQOELMSYLGKNIKYPTIA              | 199 |
| BT2762                         | -----VEEDVI-----HVSVEVMPEFP GGS AELLKYLSTHIKYPTMS             | 156 |
| BT3898_TonB_Domain2            | -----NIKYPTMA                                                 | 8   |

\*

|                                |               |                                                        |                                         |     |
|--------------------------------|---------------|--------------------------------------------------------|-----------------------------------------|-----|
| Pseudomonas_aeruginosa_TonB1   | QARRIEGRVKVLF | TTITSDGRIDDIQVLESVPSRMFDREV--RQAMAKWRFEPRVSGGKIV       | 326                                     |     |
| Escherichia_coli_TonB          | QALRIEGQVKVFD | VTDPGRVDNVQILSAKPANMFEREV--KNAMRRWRYEPGKPGSGIV         | 225                                     |     |
| BT4460                         | ACAENVKGVTLT  | FFVNKEGRPFDIKVKESLCKSLDKEAIRLIQEGPDWTYGN--QS-AE        | 443                                     |     |
| BT1668                         | LKDNVSGYALCE  | FTIDKEGVILRPHILKSTHPEFAEEALRIVKEMPNTTPAL--VGGKAV       | 320                                     |     |
| BT3896_Nterm_plus_TonB_Domain1 | QKLGIA        | GRVITQFVISKKEITSVAVVRSLHPELQAIQAITAMPTWTPGK--KDGKVV    | 150                                     |     |
| BT3192                         | FQAGEEGQVTVE  | FTIDVNGYVSDAKVTKSVSASLDKEALRIIESMPRWKSGM--QLGRPV       | 221                                     |     |
| BT1056                         | QGGVCQGRAIVQ  | FIVDKENIVQPKVVRGVDPYLDKEALRVVGLMPKWKPGEL--DDGTKV       | 256                                     |     |
| BT3673                         | QKKVSGR       | RVIVQFVIMEDGTLDQAKVVRGVDPLLDEEALRVVVKLMPKWKPGM--DRGEAV | 122                                     |     |
| BT2059                         | QENGTQ        | GRVIVQFVFNKDGSI                                        | VDKVVRSVDPYLDKEALRVINTMPKWKPGM--QRGKPV  | 214 |
| BT0813                         | IENKIQ        | GRVIVQFVFNKDGSI                                        | IFGAKVVRSVDPDLDEALRVINSMPKWKPGM--QKGEPV | 428 |
| BT3896_TonB_Domain2            | AKQKEE        | GRVIVTFIVRKDQITDARVVRSVSP                              | TLDAEALRIISNMPKWEPEGE--NNGVPV           | 66  |
| BT3898_Nterm_plus_TonB_Domain1 | HENGKQ        | GRVIVMFVVKKDGSI                                        | SDVKTVRGVDPYLDKEAERVIAAMPNWKPGK--QRGQAV | 455 |
| BT2665                         | QENGTQ        | GRVIVQFVVERDGTITDVHVARGVD                              | PYLDKEAVRVVQSMPKWIPGK--QNGKAV           | 257 |
| BT2762                         | QEMGSQ        | GRVIVQFVVDKDGSI                                        | TNPTVVRGVDAYLDKEAIRVISGMPKWKPGV--QNGKKV | 214 |
| BT3898_TonB_Domain2            | QQNKEQ        | GKVLVQTVIGKDNVSNIKILEGASAWLDAE                         | IRVVRGMPKWEPEGK--QNGQAV                 | 66  |

\* . : : . \* . : . \* :

**3<sup>rd</sup>  $\beta$ -sheet for paring with TonBox**

|                                |                                      |                               |          |     |
|--------------------------------|--------------------------------------|-------------------------------|----------|-----|
| Pseudomonas_aeruginosa_TonB1   | ARQATKMFFFKIEKRR-----                | 342                           |          |     |
| Escherichia_coli_TonB          | VNI-----LFKINGTTEIQ-----             | 239                           |          |     |
| BT4460                         | TVKFHK-----                          | 449                           |          |     |
| BT1668                         | ESDYTTYVFRPQLYKEQLQIRERELSKKH-----   | 350                           |          |     |
| BT3896_Nterm_plus_TonB_Domain1 | NVKFTLPINFHPTPAATTKATGEQ-----QP      | DST-----TDK                   | 182      |     |
| BT3192                         | AVRMSVPINFVIEQDYQVIDSLQV---KTNT----- | 249                           |          |     |
| BT1056                         | AVRFTIPVMFRLQ-----                   | 269                           |          |     |
| BT3673                         | KVRFTAPIMFNLSRSEARPTFPELVVPIGQ       | EVENRSLQGVWQSCVVQPGEHGYKILLLP | 182      |     |
| BT2059                         | RVKFTVPVMFRLQ-----                   | 227                           |          |     |
| BT0813                         | SVKFTVPIVFRNQLN-----                 | 443                           |          |     |
| BT3896_TonB_Domain2            | SVKYTIPIMFRLR-----                   | 79                            |          |     |
| BT3898_Nterm_plus_TonB_Domain1 | NVRFTVPVTFRLSGPEPAKPAETPEAVAIEK      | FEE-V-----VVVGYGPK            | EATPNNEP | 506 |
| BT2665                         | RVKFTVPVMFRLQ-----                   | 270                           |          |     |
| BT2762                         | RVKYTVPVVFRRLQ-----                  | 227                           |          |     |
| BT3898_TonB_Domain2            | AVEYTFPITFRLQ-----                   | 79                            |          |     |

|                                |                       |                               |                      |     |
|--------------------------------|-----------------------|-------------------------------|----------------------|-----|
| Pseudomonas_aeruginosa_TonB1   | -----                 | 342                           |                      |     |
| Escherichia_coli_TonB          | -----                 | 239                           |                      |     |
| BT4460                         | -----                 | 449                           |                      |     |
| BT1668                         | -----                 | 350                           |                      |     |
| BT3896_Nterm_plus_TonB_Domain1 | VFMTAQKMPRFPK---E---Q | GELDQYLKQ-----                | 206                  |     |
| BT3192                         | -----                 | 249                           |                      |     |
| BT1056                         | -----                 | 269                           |                      |     |
| BT3673                         | VLKIVSPDQTFMNI        | TAGMNGRSNAIIYCQGEYSLPSDGT     | YVEMVEKSVDPVFIQGVKNE | 242 |
| BT2059                         | -----                 | 227                           |                      |     |
| BT0813                         | -----                 | 443                           |                      |     |
| BT3896_TonB_Domain2            | -----                 | 79                            |                      |     |
| BT3898_Nterm_plus_TonB_Domain1 | TFKVVD                | EMPKF---PGG---QEGLMRYLAK----- | 530                  |     |
| BT2665                         | -----                 | 270                           |                      |     |
| BT2762                         | -----                 | 227                           |                      |     |
| BT3898_TonB_Domain2            | -----                 | 79                            |                      |     |



|                                |                                           |     |
|--------------------------------|-------------------------------------------|-----|
| Pseudomonas_aeruginosa_TonB1   | -----                                     | 342 |
| Escherichia_coli_TonB          | -----                                     | 239 |
| BT4460                         | -----                                     | 449 |
| BT1668                         | -----                                     | 350 |
| BT3896_Nterm_plus_TonB_Domain1 | -----                                     | 206 |
| BT3192                         | -----                                     | 249 |
| BT1056                         | -----                                     | 269 |
| BT3673                         | ISVERLHDNLIKLSFTVPGQGRKVTEYWFRAPSPDVKIMAD | 283 |
| BT2059                         | -----                                     | 227 |
| BT0813                         | -----                                     | 443 |
| BT3896_TonB_Domain2            | -----                                     | 79  |
| BT3898_Nterm_plus_TonB_Domain1 | -----                                     | 530 |
| BT2665                         | -----                                     | 270 |
| BT2762                         | -----                                     | 227 |
| BT3898_TonB_Domain2            | -----                                     | 79  |

**Figure S3.** Multiple sequence alignment of the TonB-dependent transporters SusC, BT0364, BT1763, BT2264, BT3332, and BT4671 from *B. theta*, RagA from *Porphyromonas gingivalis*, HasR from *Serratia marcescens*, FecA and FhuE from *E. coli*, and FoxA and Fpva from *Pseudomonas aeruginosa*. The predicted Tonbox for *B. theta* TBDT are highlighted in yellow, characterized Tonboxes for the additional TBDT are highlighted in green.

|                               |                                                                |     |
|-------------------------------|----------------------------------------------------------------|-----|
| BT2264                        | -----                                                          | 0   |
| Porphyromonas_gingivalis_RagA | -----MKRMTLFFLCLLTSIGWA-----MAQN                               | 22  |
| BT3332                        | -----MLSILGMLLL--SVPF-----V-LA--Q                              | 18  |
| BT0364                        | -----MKNFILILCLATFSQWV-----YAQN                                | 21  |
| BT1763                        | -----MPGI-----M--KNKLLCSVCFLFA--FMSA-----L-WGQ-N               | 28  |
| SusC                          | -----MKKGN-----F--MFKVLLMLIAGIFL--SIDA-----F-AQQ--             | 28  |
| BT4671                        | -----MNCNI-----LNLRHLLTVLLILCTAFLGGAIPA-----F-AQQGG            | 34  |
| Smarcescens_HasR              | -----MFIHKGT-----TPAGRLATAVRAALAAMMLTQPAVALAAQAEASSAQAAQQKN    | 49  |
| Ecoli_FecA                    | -----MTPLRVFRKTTPLVNTIRLSLLPLAGL-----SFSFAAAQ                  | 35  |
| Pseudomonas_aeruginosa_FoxA   | MTATAVVLNRNAPSSLD-FPRASRLSRSVRAALLSLAMAAGAAPL--CASAAEAAAEQARP  | 57  |
| Ecoli_FhuE                    | -----                                                          | 0   |
| Paeruginosa_Fpva              | -----MPAPHGLSPLSKAFLMRRRAFQRRILPHSLA---MAL--SLPLAGYVQAQVE      | 47  |
|                               |                                                                |     |
| BT2264                        | -----                                                          | 0   |
| Porphyromonas_gingivalis_RagA | RTVKGTVISSENEPLIGANVVVV---GNTTIGAATDLGDNFTLSVPA----NAKMLRVS    | 75  |
| BT3332                        | VLVKGTV-KDNLGEGVPGASVQV---KGTSQGTITDLGKFTLNIPQ----KNATLVIS     | 69  |
| BT0364                        | KQITGRV-VDTKGEAAIGASILE---KGTNGTITDFDGNFKLTVGP-----KAVLQIS     | 71  |
| BT1763                        | ITVKGNVTSKTDGQPIIGASVVET---TATTNGTITDFDGNFTLSVPV-----NSTLKIT   | 80  |
| SusC                          | ITVKGIV-KDTTGEPVIGANVVV---KGTTTGTITDFDGNFQLSAKQ-----GDIIVVS    | 78  |
| BT4671                        | KKMTGQV-IDENKEPMIGVSILI---VGTSTGTVTDFDGNFTLNVPK-----DSKELQFS   | 85  |
| Smarcescens_HasR              | FNIAAQPLQSAMLRFAEQAGMQVFFDEVKLDGMQAAALNGSMSVEQGLRRLIGGNPVAFR   | 109 |
| Ecoli_FecA                    | VNIAPGSLDKALNQYAAHSGFTLSVDASLTRGKQSNGLHGDYDVESGLQQLLDGSGLVK    | 95  |
| Pseudomonas_aeruginosa_FoxA   | YAI PAGQLGDVLRNRFAREAGITLSATPAQTGGYSSQGLRGSFTVQQGLARLLADTPLEAE | 117 |
| Ecoli_FhuE                    | -----MLSTQFNDRNQYQAITKPSL-----LAGC-----                        | 24  |
| Paeruginosa_Fpva              | FDIPPQALGSALQEFGRQADIQVLYRPEEVRNKRSSAIKKGKLEPNQAITELLRGTGASVD  | 107 |

|                               |                                                                      |     |
|-------------------------------|----------------------------------------------------------------------|-----|
| BT2264                        | ---MQTQEVAIKP---NLKVVLRSDAQOI-- <b>DEVVVVT</b> TAMGI-----            | 33  |
| Porphyromonas_gingivalis_RagA | YSGMTTKEVAIAN---VMKIVLDPDSKVL-- <b>EQVVVL</b> IGYGT-----             | 111 |
| BT3332                        | FIGYVTVEQKADS-QKPMVITLKEDTKTL-- <b>DEVVVVV</b> GYQE-----             | 107 |
| BT0364                        | YIGYKTQEIPVAN-KTKLNITMEEDTEVL-- <b>DEVVVVV</b> GYGA-----             | 109 |
| BT1763                        | YIGYKPVTVKAAA---IVNVLLLEEDTQMV-- <b>DEVVVVT</b> GYTT-----            | 116 |
| SusC                          | FIGYQPQELPVAA---QMNVILKDDTEIL-- <b>DEVVVVI</b> IGYGQ-----            | 114 |
| BT4671                        | YVGYETKVITIPVNSNVLNVMKSDSQVL-- <b>SDVVI</b> IGYGT-----               | 124 |
| Smarcescens_HasR              | LQPQGGIVLSRLP-----TANGDGGALAL <b>DSLTVLGA</b> GG-----NNA             | 146 |
| Ecoli_FecA                    | PLGNNSWTLEPAP-----APK <b>EDALT</b> -----VVGDWLGD-----AR              | 126 |
| Pseudomonas_aeruginosa_FoxA   | DQGDGGSFVLREAP-----A--KGDVVLNMQ <b>AVEVFA</b> LGNNLSTGDGYLATHSQIATKT | 168 |
| Ecoli_FhuE                    | -----IAL-ALLP-----SAAFAAPATE <b>ETVIVE</b> GSATAPDDGENDYSVTSTASAGTKM | 71  |
| Paeruginosa_FpvA              | FQGNAITI-SVAE-----A-ADSSVDLGAT <b>MTITS</b> NQLGTITEDSGSYTPGTIATATRL | 158 |

:
  
**Plug Domain Begins**

|                               |                                                                 |     |
|-------------------------------|-----------------------------------------------------------------|-----|
| BT2264                        | KRSEKALGYAATSVMGGEKIAESRTSDVMSSLAGKIAGVQISSTSSDPGAS--NSVIIRGV   | 91  |
| Porphyromonas_gingivalis_RagA | GQKLSTVSGSVAKVSSEKLAIEKPVANIMDALQGQVAGMQVMTTSGDPTAV--ASVEIHGT   | 169 |
| BT3332                        | VRR-RDLTGSVAKANMADVLTAPVASFQALGGRIAGVNVTSSEGMPGGN--MSIVIRGN     | 164 |
| BT0364                        | QKK-ESVVGAISSQVSSKELLKSPAANISQAIAGKISGVITSQTSQSGAPGAD-DMKIYIRGR | 167 |
| BT1763                        | QRK-ADLTGAVSVVKVDEIQKQGENNPVKALQGRVPGMNIT-ADGNPSGS--ATVRIRGI    | 172 |
| SusC                          | VKK-NDMTGSVMAIKPDELKSGITTTNAQDMLSGKIAGVSVISNDGTPGGG--AQIRIRGG   | 171 |
| BT4671                        | QRK-SDLTGSVASVGTDFNKGVMVSSPEELVNGKIAGVQIVNGGGSPTS--STIRIRGG     | 181 |
| Smarcescens_HasR              | NDWVYDEPRSVSVISREQMDNRPARHAADIL-EQTTGAYSSVSQQDP----ALSVNIRGI    | 201 |
| Ecoli_FecA                    | ENDVFEHAGARDVIRREDFAKTGATTMREVL-NRIPGVSAPENNGTGSIDLAMNFGIRGL    | 185 |
| Pseudomonas_aeruginosa_FoxA   | SKPLLETSQTVSVITREQIDDTASKTVQQAM-RYTPGIFTGQVGNRYDYVV---MRGF      | 224 |
| Ecoli_FhuE                    | QMTQRDIPQSVTIVSQORMEDQQLQTLGEVM-ENTLGISKSQADSDRALYY-----SRGF    | 125 |
| Paeruginosa_FpvA              | VLTPRETPQSITVVTQRNMDDFGLNNIDDVM-RHTPGITVSAYDTRNNYY-----ARGF     | 212 |

: . . : \* :\*

|                               |                                                           |     |
|-------------------------------|-----------------------------------------------------------|-----|
| BT2264                        | SSLSGTNQPLYVVDGVLNNSTVYSTDGLNSGYDFGNANAINPDDVANMTILKGAATA | 151 |
| Porphyromonas_gingivalis_RagA | GSLGASSAPLYIVDGMQTSLDV-----VATMNPNDFESMSVLKASATS          | 213 |
| BT3332                        | NSLTQENSPLFVIDGFPIEDSS-----AASTLNPSDIESLDFLKASATA         | 209 |
| BT0364                        | ASFAGDNQPLILVDGVERE-----FSQIAPDDIESISTLKASATA             | 208 |
| BT1763                        | GTLN-NNDPLYIIDGVPTKAG-----MHELNGNDIESIQVLKDAASAS          | 214 |
| SusC                          | SSLNASNDPLIVIDGLAIDNEG-IK-----GMANGLSMVNPADIETLTVLKASATA  | 222 |
| BT4671                        | ASLNASNDPLIVLDGVPMEVGGSSIS-----GGGNFLSLINPNDIESMTVLKASSTA | 233 |
| Smarcescens_HasR              | QD--Y-GRVNMNIDGMRQNFQK-----SGHGQRNGTMYIDSELLSGVTIDKGTG-G  | 249 |
| Ecoli_FecA                    | NPRLA-SRSTVLMDGIPVPFAP-----YGQ-PQLSLAPVSLGNMDAIDVVRGGGA-V | 234 |
| Pseudomonas_aeruginosa_FoxA   | AD--N-SVDNIYLDGLKAMGDS-----GT--F--SSMQVDPYFLERIDVLKGPSS-V | 268 |
| Ecoli_FhuE                    | Q-----IDNYMVDGIPTYF-E-----SR--WNLGDALSDMALFERVEVVRGATG-L  | 167 |
| Paeruginosa_FpvA              | S-----INNFQYDGIPTARN-----VG--YSAGNTLSDMAIYDRVEVLKATG-L    | 255 |

\*\* . : : .

|                               |                                                              |     |
|-------------------------------|--------------------------------------------------------------|-----|
| BT2264                        | LYGSRAANGVVMITTKSGRKEKGVGIEYNGGVQWSTVLRRLPE-----FQNEFG       | 199 |
| Porphyromonas_gingivalis_RagA | IYGARAANGVVFIIQTKKGMSEGRITFNASYGISQILNTKPLDNMMTGDELLDFQVKAG  | 273 |
| BT3332                        | IYGARGANGVVIITTKKGVGR-AQLSYDGSFGVQHVTRTI---PMMDAYEFVKLQNM-   | 264 |
| BT0364                        | VYGVRGANGVMLITTKRGKEQK-PTVSLTANWQIQSPTRQD---TYLDSYNSVLLLEEA- | 263 |
| BT1763                        | IYGSRAANGVIIITTKQGKKGQ-IKINFASVSASMYQSKM---NVLNTEQYGRAMWQA-  | 269 |
| SusC                          | IYGSRASNGVIIITTKKGNQAPSVSYNGSVSFSKTQKRY---DVLSGDEYRAYANQL-   | 278 |
| BT4671                        | IYGSRASNGVIIITTKKGSQSD-IKVSFQTTNSIATKTKTS---DMLNTDEFINIVNQY- | 288 |
| Smarcescens_HasR              | MGSAGTLGGIATFNTVSASDFLAPGKELGGKLHASTGD-----                  | 287 |
| Ecoli_FecA                    | RYGPQSVGGVVNFVTRAI-----PQDFG----IEAGV-----                   | 262 |
| Pseudomonas_aeruginosa_FoxA   | LYGRSLPGGLVALTSKKPL-----YEDYRQ-ITGSIGN-----                  | 300 |
| Ecoli_FhuE                    | MTGTGNPSAAINMVRKHAT-----SREFKGDVSAEYGS-----                  | 200 |
| Paeruginosa_FpvA              | LTGAGSLGATINLIRKKP-----THEFKGHVELGAGS-----                   | 287 |

. . . :

|                               |                                                             |     |
|-------------------------------|-------------------------------------------------------------|-----|
| BT2264                        | MGWNGNHTELE-----NGSWGPRFDGSMQLWGNVY-----NNSQKLKPYVAMPDNIK   | 246 |
| Porphyromonas_gingivalis_RagA | F--WGNNQTVQKVKDM-----ILAGAEDLYGNYSKDEYGKT--LFPV--DFNHDA     | 319 |
| BT3332                        | ---YPTVVAGS-----YLMN--Y-----EGKQWTLDDY--KNIPQY              | 293 |
| BT0364                        | ---LANDGLPSQY-----S-ASDIEMYKRA-----SAGQLSGIDA--LLYPNV       | 300 |
| BT1763                        | ---YVNDGENPNGNALGYAYNWGYNADGNPVLGYMT-----LSKYLDSKNT--MPVADT | 318 |
| SusC                          | ---WG-----DK-----LPAD--LGTANT                               | 292 |
| BT4671                        | ---GT-----EH-----QKSL--LGDYRT                               | 302 |
| Smarcescens_HasR              | ---NGTHFIG-----SGILALGNETG                                  | 305 |
| Ecoli_FecA                    | ---EGQLSPTSSQN-----NPKETHNLMVGGTA-----DNGF--GTALLYSGTRGS    | 303 |
| Pseudomonas_aeruginosa_FoxA   | ---MGQKEMGFDFS-----GPLDEEK-----RI--AYRLIGLKGSD              | 332 |
| Ecoli_FhuE                    | ---WNKERYVADLQ-----SPLTEDG-----KI--RARIVGGYQNNND            | 232 |
| Paeruginosa_FpvA              | ---WDNYRSELDVS-----GPLTESG-----NV--RGRAVAAYQDKH             | 319 |

|                               |                                                              |     |
|-------------------------------|--------------------------------------------------------------|-----|
| BT2264                        | D-FFDAGFRY-----SNLSLFNGA-TDKSDYVVSFSQISDDGMIPTDAD-----SY     | 290 |
| Porphyromonas_gingivalis_RagA | D-WLKALFKTAP-TSQGDISFSGG-SQGTSYYASIGYFDQEGMAREPA-----NF      | 366 |
| BT3332                        | N-WQDEIFKTAW-QQNHTVRLAGG-TEGVRYNASLSYFDQDGTLIETG-----Y       | 339 |
| BT0364                        | D-WYDTVLRNSAPAQRYNVNIQGG-TKRMRYFTSAEYYNQQGLFKEFSQDEYGNKSNSSF | 358 |
| BT1763                        | D-WFDEITRTGV-IQQYNLSVSNQS-EKSSFFSLGYKLNKLVIKDTD-----F        | 364 |
| SusC                          | D-WQDQIFRTAV-STDHVSING-GFKNLPHYRVSLGYTDDNGIVKTSN-----F       | 338 |
| BT4671                        | N-WNDEIYQTAF-GTDNNLSVSGLALPWLPRVSTGMYYQDGLKTDN-----T         | 349 |
| Smarcescens_HasR              | DILLAASERHLG-----DYW--PGNKGDIGNIRINN-----DTGNY               | 339 |
| Ecoli_FecA                    | D-WREHSATRID-----                                            | 314 |
| Pseudomonas_aeruginosa_FoxA   | T-QFDHVKEERY-----AI-----                                     | 345 |
| Ecoli_FhuE                    | S-WLDRYNSEKT-----FF-----                                     | 245 |
| Paeruginosa_FpvA              | S-FMDHYERKTS-----VY-----                                     | 332 |

|                               |                                                              |     |
|-------------------------------|--------------------------------------------------------------|-----|
| BT2264                        | DKYTFSARGSHKAGA-----LTF-----SSSLNYAYQKN--NFATTGQGLSML        | 331 |
| Porphyromonas_gingivalis_RagA | KRYSGRLNFESRINEW-LKVGA-----NLSGAIANRRSA----DYFGKYYMG         | 408 |
| BT3332                        | KRMQGRMNTVVRGKLNMSLTT-----NYSRSIQTGSTP-SSTSYSGMNN--          | 383 |
| BT0364                        | KRFAFRANLDFLMTKD-LTLSV-----NFGTRFEERRGPNSNESRDGTYS--         | 402 |
| BT1763                        | DRFSARMNSDYKLIDD-I-LTI-----G--QHFTLNRTS-EVQAPGGIIE--         | 404 |
| SusC                          | RRFTASVNLAPSFFED-H-LKF-----NINAKFMN-GKN-RYADTGAAIG--         | 379 |
| BT4671                        | KRFTGNVNLTPSFFHN-E-LRF-----NIGLKGTY-SKN-RFADTDAIWA--         | 390 |
| Smarcescens_HasR              | DRYAESIKNNKIPDTH---YRMHSRLAKVGNL PANQRLQLSYLQTQ----TASPIAG-- | 390 |
| Ecoli_FecA                    | ---DLMLKSKYAPDEV---HTF-----NSLLQYYD----GEADMPG--             | 345 |
| Pseudomonas_aeruginosa_FoxA   | ---APTLAIDFSDDTT---LTL-----QG-YLQHD----PNGGYHG--             | 375 |
| Ecoli_FhuE                    | ---SGIVDADLGDLLT---LSA-----GYEYQRID----VNSPTWG--             | 276 |
| Paeruginosa_FpvA              | ---YGILEFDLNPDTM---LTV-----GADYQDND----PKGSGWS--             | 363 |

|                               |                                                         |     |
|-------------------------------|---------------------------------------------------------|-----|
| BT2264                        | NSLYQTPRD-----ISIIGLEDQNDPFNTPGYYYTPYGVMN-----          | 367 |
| Porphyromonas_gingivalis_RagA | SGTFGVL-----TM-P-----RYYNPFVDVNGDLADVYYMYGATRPSMT       | 445 |
| BT3332                        | -LFYSVW-----GYRPVTSPTDPLSFLM----DSSTDNAV-----DSSNDYRF   | 421 |
| BT0364                        | -QAF-----YEMNHTPGWLFVVSYTVGEGEDQ-----KTLYSGSSQYQN       | 440 |
| BT1763                        | -TALDIP-----SAIPVYASDGSWGGPVGWPD-----RRN-----           | 434 |
| SusC                          | -GALCID-----PTRPVYSNEDPYQFTGGYQWQININSTTGFSNPDKYTSNPNPQ | 428 |
| BT4671                        | -G-STLN-----PTIPVYSGNDF---GGYNEAIDANG-VP-----VTGALA     | 426 |
| Smarcescens_HasR              | -T-LTNLGT-----RPPY--ELGWKRTGYTDV-MA-----                | 415 |
| Ecoli_FecA                    | -G-----LSRADY-DADRWQSTRPYDRFWGRR-----                   | 370 |
| Pseudomonas_aeruginosa_FoxA   | -G-VPADGTLSSHNGRHISREFFDGEPSKDDDFDRTQRMFG-----          | 413 |
| Ecoli_FhuE                    | -G-LPRWNTDGSS--NSYDRARS-TAPDWAYNDKEINKVF-----           | 311 |
| Paeruginosa_FpvA              | -GSFPLFDSQGNR--NDVSRSFN-NGAKWSSWEQYTRTVF-----           | 399 |

|                               |                                                               |     |
|-------------------------------|---------------------------------------------------------------|-----|
| BT2264                        | -PYYILN---NY--LNEYESERFYGKFLDYEFLL---KYFKFTYRMGLDTTTGQSDKGP   | 418 |
| Porphyromonas_gingivalis_RagA | EPY--FAKMRPF----SSESHQANVNGFA--QITPI-KGLTLKAQAGVDITNTRTSSKRM  | 496 |
| BT3332                        | NPIKSQKN--EYRKSQ--TNNLQ--MNGFAE--YE-VLKGLKLVKVSAGYTYDSRQDQFNN | 473 |
| BT0364                        | NIVARFAKAGFYRSTNTINE----TNFIVDYKMNWLTKGLAAKGMLSFDYDAYYRAAFNA  | 496 |
| BT1763                        | -PRAVLE---YN-KDNRYTYWRMFGDAYV--NLTPFK-GFNLRSTFGLDYANKQARYFTY  | 486 |
| SusC                          | NPLAAL---LK--NDKANSNDFVGNVDVDYKFHFLP-DLRLHASIGGEYAEGTQTTIVS   | 482 |
| BT4671                        | NAVGRLN---QY--DSTSDVYRFIGSASVDWNVRWVK-GLRLHTTGGYDWSKGGHIYVP   | 480 |
| Smarcescens_HasR              | -RNAAFD-----YSLAPE-----DV----DWL--DFQAKLYYVDTQDD--SDTYST      | 452 |
| Ecoli_FecA                    | -KLASLG-----YQFQP----DSQHKF----NIQ--GF-----YTQ-----           | 395 |
| Pseudomonas_aeruginosa_FoxA   | ---YQLE-----HRIDDVWSARQNFY----LDS--DVDLSQVYAY-----            | 445 |
| Ecoli_FhuE                    | ---MTLK-----QQFADTWQATLNATH----SEV--EFDSKMMYVDAYVN--K----A    | 349 |
| Paeruginosa_FpvA              | ---ANLE-----HNFANGWVGKVLQDLH----KIN--GYHAPL-----              | 427 |

|                               |                                                             |     |
|-------------------------------|-------------------------------------------------------------|-----|
| BT2264                        | -NLYALYYEGTPNGEGQ--GSSSPFSGETGQYSE-----QITRRREINQDIMVNFN    | 466 |
| Porphyromonas_gingivalis_RagA | -PN--NPYDSTPLGERR-----ERA-----YRDVSKSFTNTAEYK               | 528 |
| BT3332                        | -SN----TR---YGGPT--STDKVN----AQVTR-----QERLTWLNENTLTYQ      | 508 |
| BT0364                        | -DF--ATYE---LNDRT---NYNSID-AYTQFNTDTELAYLGNQTTTYKLYMEFQLNWA | 546 |
| BT1763                        | -----PYQ---EGTQT--NNGKSAV-EAQ-----EHWTKMMWNAIATYQ           | 520 |
| SusC                          | -----PYS---FGNNY--YGWNGD---VTQ-----YKY-NLSYNIYVQYI          | 513 |
| BT4671                        | -KEAVSYYT---TGGRD--YTYGP-----Q-----KNY-NKLLTIYANYH          | 513 |
| Smarcescens_HasR              | SSLLDNGYA---TRTR-----LRTYGAQAQNTSR                          | 478 |
| Ecoli_FecA                    | --TLRSGYL---EQGKR--ITLSPR----NYWVR-----GIEPR-----YSQI       | 427 |
| Pseudomonas_aeruginosa_FoxA   | -----GWS---ASEPNKLNRYFSG----AREH-----LQAYIVDNMLQAE          | 478 |
| Ecoli_FhuE                    | DGMLVGPYS---NYGPG--FDYVGG----TGWNS-----GKRKVDALDLFADGS      | 389 |
| Paeruginosa_FpvA              | -GAIMGDWP---APDNS--AKIV-----AQKYT-----GETKSNSLDIYLTGP       | 464 |

|                               |                                                              |     |
|-------------------------------|--------------------------------------------------------------|-----|
| BT2264                        | MPVN-DFNINALVGFNGNERK-----VSYQYSEVNDLTIPTWFN---LKNSGKTPIV    | 514 |
| Porphyromonas_gingivalis_RagA | FSIDEKHDLTALMGHEYIEYEGDVIGASSKGFESDKL-----MLLSQGKTGNLSLSP    | 580 |
| BT3332                        | TNIK-KKHFLNVLGGITFQNS-----DYEIYSFRTHHIPNESLGMAGMSEGQAGTT     | 558 |
| BT0364                        | RKFG-KHDITAMALYNQN-----DYS                                   | 566 |
| BT1763                        | LEVG-KHRGDVMIGMELNRED----DSHFSGYKED--FSILTPDYMW---PDAGSGTAQA | 570 |
| SusC                          | KSLG-ANFDIMVGGEEQ-----HFHRNGFEEGQGWDSYT----Q---EPHDAKLREQ    | 558 |
| BT4671                        | N-----DFDAIHSGIDV-----TV---GY-DYQFWKYTTPFYAI--LSADGVQQSTS    | 554 |
| Smarcescens_HasR              | FS-----LAPGHDFRA-----NYGLEFYDKATSDSSRQGM---GVTP--            | 514 |
| Ecoli_FecA                    | FMIG-PSAEVGVGYRYLNEST-----HEMRYTATS-----SGQLPS-GSSPYD        | 470 |
| Pseudomonas_aeruginosa_FoxA   | FATG-AARHTLLTGLDYQRRRTVVDWRSGSASALDAFNPVY-----GDDAISYF--PD   | 528 |
| Ecoli_FhuE                    | YELF-GRQHNLMFGGYSYK----QNNRYFSSWA-NIFPDEIGSFYFNFGNFPQTDWSPQS | 443 |
| Paeruginosa_FpvA              | FQFL-GREHELVVGTSAF----SHWEGKSYWNLNRNYDNTTDDFINWDGDIGKPDWGTPS | 519 |

|                               |                                                              |     |
|-------------------------------|--------------------------------------------------------------|-----|
| BT2264                        | EQHMELRRLMGVFGQFEGSWKNMLYLTVTARNDWSSTLPKENRSFFYPGITG-SFIFSEL | 573 |
| Porphyromonas_gingivalis_RagA | EHRVAEYAYLSFFSRFNYGFDKWMYIDFSVRNDQSSRFSGSNNRSAWFYVGG-MFDIYNK | 639 |
| BT3332                        | TSAKSSWAMLSYLGRVTYNYMSKYATVSFRADGSSKFNKDNRYGYFSPGSL-AWSFSEE  | 617 |
| BT0364                        | YQADLAERYQGLVGRATYGYDDRYLAEVNFGYNGSENFMRRRFGFFPSFSV-GWRISNE  | 625 |
| BT1763                        | YGAGEGYSLVSFFGKMNYSYADRYLLSLTLRRDSSRFSGKNHRYATFSPVSL-GWRITQE | 629 |
| SusC                          | TAYATRNTLVSYFGRNLNYSLLNRYLFTFTMRWDGSSRFKDNRWGTFPSLAL-GWKIKEE | 617 |
| BT4671                        | AATDQRHSLMSYYGRNLNYTFMDRYLLMATMRRDSSRFASDNRWGTFPSVAL-AWRVSQE | 613 |
| Smarcescens_HasR              | ---AGNRVASLFLANLTYDYDGWLTLEGGLRYDRYRLRGQTGL--SYPDLAKDGQRYTID | 569 |
| Ecoli_FecA                    | RDTRSGTEAHAWYLDKID-IGNWTITPGMRFEHIESYQNNAI--T-----           | 513 |
| Pseudomonas_aeruginosa_FoxA   | DNHTRRLEQTGVYLDLID-IDQWRFSGLRQDWSVTDKNRS--T-----             | 571 |
| Ecoli_FhuE                    | LAQDDTTHMKSLYAATRVTLADPLHLILGARYTNWRVDTLTY-----              | 485 |
| Paeruginosa_FpvA              | QYIDDKTRQLGSYMTARFNVTDDLNLFLGGRVVDYRVVTGLNP-----             | 561 |

|                               |                                                            |     |
|-------------------------------|------------------------------------------------------------|-----|
| BT2264                        | -LNDNLQDVITFGK-----IRASWGKTGNDADVY-----MVNPVYAQSSNRIP----  | 615 |
| Porphyromonas_gingivalis_RagA | -FIQE-SNWLSDLR-----LKMSYGTGENSEIGNY-----NHQALVTVN-----     | 676 |
| BT3332                        | EFMKPLKSVLSSGK-----VRLSWGTLGNNRIGEY-----DYYALLAVLKSrvGSYTS | 665 |
| BT0364                        | AFMKGTTEEWLNNLK-----IRASYGEVGNdVYKVNGVKQRFLYQAVWTQ-----    | 669 |
| BT1763                        | NFMKEL-TWLDDLK-----LRASWGQTGNQEISNL-----A-RYTIYAPN-----    | 667 |
| SusC                          | NFLKDV-NVLSDLK-----LRLGWGITGQQNIGDD-----FAYLPLYVVN-----    | 656 |
| BT4671                        | HFFEPLRtVMNDVK-----LRVSYGITGQQDGITN-----YGYIPVYTPG-----    | 653 |
| Smarcescens_HasR              | NPCKALRLTGCSTTTREDWDVDRDQGKLSPTLAVAVRPGV--EWLELYTTY-----   | 618 |
| Ecoli_FecA                    | -----GT-----HEEVSYNAPLPALNVLYHLTD--S-WNLYANT-----          | 544 |
| Pseudomonas_aeruginosa_FoxA   | -----GS-----KADDDWEKFTGRIGALYLFdN--G-LAPYVSY-----          | 602 |
| Ecoli_FhuE                    | -----SM-EKNHTTPYAGLVFDIND--N-WSTYASY-----                  | 512 |
| Paeruginosa_FpvA              | -----TIRESGRFIPYVGAVYDLND--T-YSVYASY-----                  | 589 |

|                               |                                                              |     |
|-------------------------------|--------------------------------------------------------------|-----|
| BT2264                        | ---FGSLTFPLGGVN-----AYSAGNVLGSNTLSPEMTTESEVGLNMA             | 655 |
| Porphyromonas_gingivalis_RagA | -----N--YTEDAM-----GLSISTAGNPdLSWEKQSQFNFGLAAG               | 710 |
| BT3332                        | TNSLPSGVYPFDNDA-----TNAGVVPTSLPNKDLKWETTEQWNAGLDLG           | 710 |
| BT0364                        | ----IANDYHFGTTGYT-----GIYESQYPNYAVTWERAHKYNLGLFEG            | 709 |
| BT1763                        | ---YGT-TDSFGGQSYGTAYDITGSNGGGVLPsGFKRnQIGNDNIKWETTTQTnVGIDFS | 723 |
| SusC                          | ---NEYAQYpFGDTYY-----STSRPKAFNENLKWekTTTWNAGLDFG             | 696 |
| BT4671                        | ---LDGAQYLFGGNPI-----YTYRPEAYNPELKWETTKSWNYGIDLA             | 693 |
| Smarcescens_HasR              | -----GKSWRPPAITETLT----N----GSAHSSSTQYPNPFLQPERsRAWEvGFNVQ   | 663 |
| Ecoli_FecA                    | -----EGSFGTVQYSQI-----GKAVQSGNVEPEKARTWELGTRYD               | 580 |
| Pseudomonas_aeruginosa_FoxA   | -----SESFNPNA-----YSDASGTPLAPTEGKQWELGLKFQ                   | 634 |
| Ecoli_FhuE                    | -----TSIFQPQND-----RDSSGKYLAPITGNnyELGLKSD                   | 544 |
| Paeruginosa_FpvA              | -----TDIFMPQDS--W-----YRDSSNKLLPEDEGQNYEIGIKGE               | 623 |

. : \*

|                               |                                                               |     |
|-------------------------------|---------------------------------------------------------------|-----|
| BT2264                        | FF-----KNRlSFDVSYNRNTDKQIFSLAMPASGY-----TAQNMNLGKIRNRGIE      | 703 |
| Porphyromonas_gingivalis_RagA | AF-----NNRLSAEVDFYVRTTNDMLIDVPMPIISGF-----FSQYQNVGSMKNTGVD    | 758 |
| BT3332                        | FF-----DERIGITMDIYRKTTRDLLLLDASLPFSSG-----YYSATKNIGKVRNDGLE   | 758 |
| BT0364                        | LW-----NGLLNGNIDVFYEKRNDILTPYLTRPQWVG-----VNMAAGNLGETNNKGFEG  | 758 |
| BT1763                        | LF-----KQSLYGSLEYYYKkATDILTEMAGVGVlGE-----GGSRWINSgAMKNQGFEG  | 772 |
| SusC                          | FL-----NGRITGGIDGYFRKTDdLLNSVKIPVGTNF-----NAQMTQNIgSLENYGME   | 745 |
| BT4671                        | FL-----ENRFTFSADFYTRKTENLLATVPMPAGTNF-----DKLMLQNVGNVDSKGLE   | 742 |
| Smarcescens_HasR              | QPDLWFEgDRLVAKVGYFDTKVDNYINLAI DRNKpGLVQPSIGNAAyVNNLSKTRFRGLE | 723 |
| Ecoli_FecA                    | -----DGALTAEMGLFLINFNnQYDSNQ-----TNDTvtARGKTRHTGLE            | 620 |
| Pseudomonas_aeruginosa_FoxA   | AP-----GSNSFYtASLFHITQENVASKEP-----QDNFYtSVGEVRSQGLE          | 676 |
| Ecoli_FhuE                    | WM-----NSRLTTTLAIfrIEQDNVAQSTGT-PIPGSN-----GETAYKAVDGTvSKGVE  | 593 |
| Paeruginosa_FpvA              | YL-----DGRLNTSLAYFEIHEENRAEEDAL-YNSKPTNPA--ITyAYKGI-KAKTKGYE  | 674 |

: . \* :

|                               |                                                               |     |
|-------------------------------|---------------------------------------------------------------|-----|
| BT2264                        | LLISGTPIRTK----DFSWELTWNFTKNWSKVISLPEELGGITTIYGL----NGGTSMYA  | 755 |
| Porphyromonas_gingivalis_RagA | LSLKGTIYQNK----DWNVYASANFNYNRQEITKLFGLNKYMLPNT-----GT---I-    | 804 |
| BT3332                        | LSLNTVNFQTR----AFKWTTNFNISFNKNKVLALSENQTALLTAAQFDQNYNGQSSYIA  | 814 |
| BT0364                        | IELKHANHIGK----DFTYNASLTFSHARNEIRNMDEPATKTAYRKQE-----GH---P-  | 805 |
| BT1763                        | FNLGYRNKTAF----GLTYDLNGNISTYRNEIILELPETVAANGKFGGN-----GV---KS | 820 |
| SusC                          | FSINAKPIVTK----DFTWDLNITWNHNEITKLTGGDDSDY-YVEA-----GD---KI    | 792 |
| BT4671                        | LSVTGHIINTK----NWSWTASANAQKVRKIKNLTLTPGAPSPDTEV-----GP---W-   | 789 |
| Smarcescens_HasR              | YQLNYDAGVIFYADLTYTHMIGKNEFCSNK----AWLGGRLR-----               | 760 |
| Ecoli_FecA                    | TQARYDLGTLTPTLDNVSIIYASYAYVNAE-----IRE-----                   | 652 |
| Pseudomonas_aeruginosa_FoxA   | LEAH-----TQLSDNLKLLGSYTYTDIT-----YTK-----                     | 702 |
| Ecoli_FhuE                    | FELN-----GAITDNWQLTFGATRYIAE-----                             | 616 |
| Paeruginosa_FpvA              | AEIS-----GELAPGWQVQAGYTHKIIR-----                             | 697 |

|                               |                                                              |     |
|-------------------------------|--------------------------------------------------------------|-----|
| BT2264                        | ITGMP-----VGVFKAQVAERDP-Q-----GRIVVNS                        | 781 |
| Porphyromonas_gingivalis_RagA | -----WEIGYP-NSFYMAEYAGIDKKTGKQLWY-----VPGQVD                 | 837 |
| BT3332                        | KVGLPMG---LMYGYVYEGTYKYD--DFNK-SGNSYSLKPGVPHYSTETNTQPGMPKYAD | 868 |
| BT0364                        | -----IN---QYFGLVCDGFVTQA--DLNN-PD-----FP-VSTFGNVQVGDLYRD     | 845 |
| BT1763                        | VVGHTYG---AQVGYIADGIFKSQ--DEVD-N-----HATQEGAAVGRIRYRD        | 862 |
| SusC                          | SRGNNTKVQAHKVGYAANSFYVYQ--QVYD-----E---NGKPIENMFVD           | 832 |
| BT4671                        | --IDAYQMVFSTDYAPYSFYLYK--QLYD-A-----E---TGQPIEGLYAD          | 828 |
| Smarcescens_HasR              | -YGDGSR-----RGNFYVEPDAASND-----FVT-----                      | 783 |
| Ecoli_FecA                    | -KGDY-----GN-----LVP-----FSP-----                            | 665 |
| Pseudomonas_aeruginosa_FoxA   | -SLDGNQ-----GH-----TPN-----QAP-----                          | 716 |
| Ecoli_FhuE                    | ---DNEG-----NA-----VNP-----NLP-----                          | 628 |
| Paeruginosa_FpvA              | ---DDSG-----KK-----VST-----WEP-----                          | 709 |

|                               |                                                            |     |
|-------------------------------|------------------------------------------------------------|-----|
| BT2264                        | S--TGLPVE----ASEFGICGDMNNKYQMGVSTNLKYKGI-----SLGIDFDIRQGG  | 827 |
| Porphyromonas_gingivalis_RagA | ADGNKVTTSQYSADLETRIDKSVTPPITGGFSLGASWKGL-----SLDADFAYIVGK  | 889 |
| BT3332                        | LNGDGVVDS----NDRTI-IGRGLPIHTGGFTNNFEYKGI-----DLSIFFQWSYGN  | 915 |
| BT0364                        | MNGDGFIDS----RDETFIGYSDVPENTYALSGLCEYKGI-----GFSIMFQGVDPHV | 893 |
| BT1763                        | IDHNGVIDE----RDQNW-IYDPTPSFSYGLNIYLEYKNF-----DLTMFWQGVQGV  | 909 |
| SusC                          | RNGNGTIDS----GDKYI-YKKPAGDVLMLGLTSKMQYKNF-----DFSFLRASLNN  | 879 |
| BT4671                        | LDGDGEITN----KDRYH-HHSPAPDWILGFSTSLRYKKW-----TLSTSLRANIGG  | 875 |
| Smarcescens_HasR              | CD-----GGTQFGSAAYLPGDRGSVTLGGRAFDRKLDAGVTVRFAPGYQDSSVP     | 832 |
| Ecoli_FecA                    | KH-----KGTGLVDYKPG-----NWTFLN-----NSDFQSSQFA               | 694 |
| Pseudomonas_aeruginosa_FoxA   | KH-----MASLWADYAFDAGPLSGLSIGG-----GARYVGETWA               | 750 |
| Ecoli_FhuE                    | RT-----TVKMFTSYRLP--VMPELTVGG-----GVNWQNRVYT               | 660 |
| Paeruginosa_FpvA              | QD-----QLSLYTSYKFK-GALDKLTVGG-----GARWQGKSWQ               | 742 |



|                               |                                                                |     |
|-------------------------------|----------------------------------------------------------------|-----|
| BT2264                        | VMYSRTKDI-NYFTGNAIQTAYNDRNPLIVPNSVKNKIVNGENVTYVENTTTPITSSNIYKY | 886 |
| Porphyromonas_gingivalis_RagA | WMINNDRY-----FTENGGGLMQLNKDKML-----LNAWTEDNKETD-----VPK-----   | 929 |
| BT3332                        | DIMNANRL---FFESSNNRSRELNQFASY----ANRWTPENPTSD-----IPA---AT     | 958 |
| BT0364                        | SRYYDAEAMYAFVNGGKV-----KEHH----LNRWNPQSEAY-NLTHASYPLLHYDS      | 941 |
| BT1763                        | DIISDVKKKSDFWSASNV--GFLNKGTRL----LNAWSPTNPNSD-----IPA-LTRS     | 955 |
| SusC                          | YVYYDFLSNKANVSTSGL-----FS----NNAYSNTSA-----EA-VALG             | 914 |
| BT4671                        | YIFNGMAMNTGAWETM-----S----YNDYQLNNLN-----RS-FLDT               | 908 |
| Smarcescens_HasR              | SN-----                                                        | 834 |
| Ecoli_FecA                    | DNANTVKE-----S-----                                            | 703 |
| Pseudomonas_aeruginosa_FoxA   | DKENTLRV-----                                                  | 758 |
| Ecoli_FhuE                    | DT----VT-----P-----                                            | 665 |
| Paeruginosa_FpvA              | MVYNNPRS-----R-----                                            | 751 |

|                               |                                                               |      |
|-------------------------------|---------------------------------------------------------------|------|
| BT2264                        | WGDGSDMGSCFLVDKSYVKLRSVVLGWDLPKRWLAKT-PFQAVKVSAYGNNLFVWTPSS   | 945  |
| Porphyromonas_gingivalis_RagA | -LGQSPQFDTHLLENASFLRLKLNKLTIVLPNSLFAGQNVIGGARVYLMARNLLTWT--K  | 986  |
| BT3332                        | NSSSNRVISSRIIEDGSYLRLKNVTVGYTFFPAKLVKKW-KIDKARVYVAAQNLWTCT--G | 1015 |
| BT0364                        | YGDHNQRKNSFFLKNGNFLRLKNIELSYSLPARWIRKV-AMNECRVYVNANLLITWD--K  | 998  |
| BT1763                        | DTNNEQRVSTYFVENGSLKLRNIQLGYTVPAVISKKM-RMDRLRFYCQAQNLITIKSKN   | 1014 |
| SusC                          | LSGQGDYMSDYFIHNASFLRCDNITLGYSFQNLWKTQTYKGVGGRVYATVQNPFIIS--K  | 972  |
| BT4671                        | RFTKRQFLSDHYLENASFLKMDNLQLSYDFGRIYKT-----IGLHASAMVQNVFTVT--K  | 961  |
| Smarcescens_HasR              | -YPYLADWPKYT-----LFDLYASYKLT-----DSLTLRGSVENLTNRAYVV          | 875  |
| Ecoli_FecA                    | ADGSTGRIPGFM-----LWGARVAYDFGP-----QMADLNLAFGVKNIFDQDYFI       | 748  |
| Pseudomonas_aeruginosa_FoxA   | -----PDYT-----LVDARIGYDLGKL-----GLKGLDVSLNANNLLDKDYVA         | 796  |
| Ecoli_FhuE                    | YGTFRAEQGSYA-----LVDLFTRYQVT-----KNFSLQGNVNNLFDKTYDT          | 707  |
| Paeruginosa_FpvA              | WEK--FSQEDYW-----LVDLMARYQIT-----DKLSASVNVNNVFDKTYYT          | 791  |

. : . \*

|                               |                                          |      |
|-------------------------------|------------------------------------------|------|
| BT2264                        | NTFIDPEMTSFGNDLEGNYGEYTANPSSRRRFGFNLMVKF | 984  |
| Porphyromonas_gingivalis_RagA | YKGFDPPEAG-----GNVG-KNQYPNSKQYVAGIQLSF   | 1017 |
| BT3332                        | YSGYDPEVSVRNSALTPGLD-YSSYPRAYSISFGVSLGF  | 1053 |
| BT0364                        | LDGLCDPE-----SEG-SNRYPIPKTVNFGVNIKF      | 1027 |
| BT1763                        | FTGEDPENP-----N-----FSYPIPVNITFGLNIGF    | 1041 |
| SusC                          | YKGLDPEVK-----SGID-ANPYPRAMTFLGLSLQF     | 1003 |
| BT4671                        | YKGVDPETA-----NGVD-TSVYPRPRTYSTITGLNF    | 992  |
| Smarcescens_HasR              | SYGET-----LANTLGRGRTVQGGVEYRF            | 899  |
| Ecoli_FecA                    | RSYDDNN-----KGIYAGQPRTYLYMQGSLKF         | 774  |
| Pseudomonas_aeruginosa_FoxA   | SCYSL-----DFCYFGEKRNVTATVNYQF            | 820  |
| Ecoli_FhuE                    | NVE-----GSIVYGTPRNFSITGTYQF              | 729  |
| Paeruginosa_FpvA              | NIGFY-----TSASYGDPRLNMFSTRWDF            | 815  |

**Figure S4.** Average growth curves of wild-type (WT) and TonBox deletion ( $\Delta$ TonBox) *B. thetaiotaomicron* cultured in 2.5 mg ml<sup>-1</sup> maltose (A) and maltoheptaose (B).

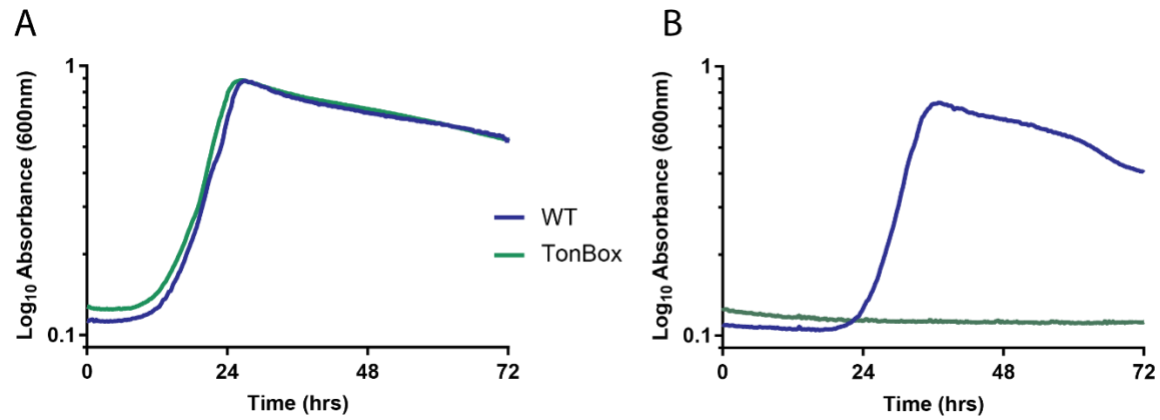

**Figure S5. A-C.** Lag times (time for absorbance to reach or surpass 0.3) were measured for four independent experiments and normalized to the corresponding growth of the wild-type strain for each experiment. Each box shows the 25-75% percentile, the whiskers show minimum to maximal values, the line in the middle of the box shows the median of the data. Each strain was grown on 5 mg ml<sup>-1</sup> glucose (A), 5 mg ml<sup>-1</sup> maltose (B), or 2.5 mg ml<sup>-1</sup> potato amylopectin (C) as the sole carbon source. **D.** Lag times for growth on glucose and potato amylopectin (as also shown in A and C) are presented to allow for comparison across TonB deletion strains. P-value determined by unpaired T-test. **E-F.** Representative average growth curves of wild-type (WT), TonB4 deletion strain, and the TonB4 deletion strain with the TonB4 gene complemented in another location on the genome cultured on 2.5 mg ml<sup>-1</sup> maltoheptaose (E) or 5 mg ml<sup>-1</sup> maize amylopectin (F).

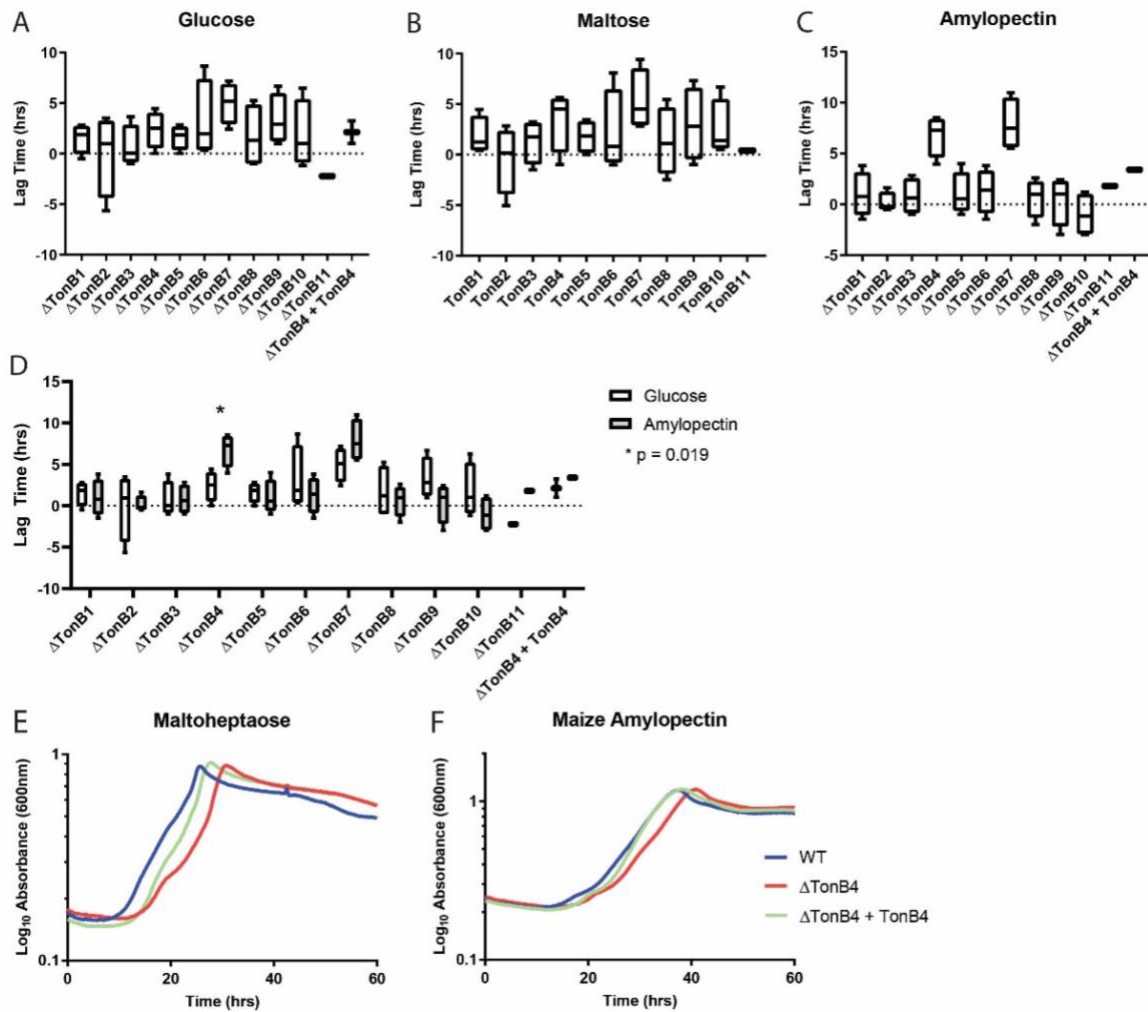

Supplement: jb.00218-23-s0001.pdf [file jb.00218-23-s0001.pdf]
